# Supplementary material for: Identification and mapping of QTLs associated with drought tolerance traits in rice by a cross between Super Basmati and IR55419-04
Source: PubMed Central journal article supplement — Breed Sci. 2019 Mar 28;69(1):169–78. doi: 10.1270/jsbbs.18068 (PMC6507710; doi:10.1270/jsbbs.18068), 2019-03-28
Supplement: 69_18068_1.pdf [file 69_18068_1.pdf]

Supplemental Table 1. Phenotypic traits data of parents and selected individuals of F<sub>2</sub> population evaluated under severe drought stress at vegetative stage

| <b>Genotype</b>         | <b>PLHT</b> | <b>TILL</b> | <b>CL</b> | <b>LDW</b> | <b>SDW</b> | <b>TSDW</b> | <b>LFDG</b> | <b>TWU</b> | <b>LFA</b> | <b>TRDW</b> | <b>DRL</b> | <b>DRVOL</b> | <b>DRSA</b> | <b>DRAD</b> |
|-------------------------|-------------|-------------|-----------|------------|------------|-------------|-------------|------------|------------|-------------|------------|--------------|-------------|-------------|
| Super Bas               | 100.0       | 16          | 27.0      | 6.90       | 6.86       | 15.02       | 7           | 3710.5     | 312.4      | 0.963       | 249.1      | 0.229        | 24.6        | 0.245       |
| IR55419-04              | 111.2       | 11          | 39.9      | 9.92       | 11.41      | 24.46       | 1           | 4955.5     | 703.9      | 2.137       | 7075.3     | 2.538        | 399.8       | 0.667       |
| F <sub>2</sub> Plant-1  | 103.5       | 23          | 31.9      | 8.62       | 5.95       | 16.27       | 5           | 3684.5     | 287.4      | 1.148       | 117.9      | 0.108        | 12.7        | 0.342       |
| F <sub>2</sub> Plant-2  | 104.0       | 18          | 29.0      | 7.71       | 6.21       | 15.98       | 7           | 3582.5     | 158.5      | 1.301       | 163.0      | 0.258        | 23.0        | 0.449       |
| F <sub>2</sub> Plant-3  | 103.8       | 19          | 29.9      | 8.54       | 8.01       | 18.68       | 7           | 3474.0     | 153.1      | 1.639       | 0.0        | 0            | 0.0         | 0           |
| F <sub>2</sub> Plant-4  | 93.9        | 14          | 27.1      | 7.42       | 5.63       | 14.98       | 5           | 3555.0     | 317.2      | 1.616       | 0.0        | 0            | 0.0         | 0           |
| F <sub>2</sub> Plant-5  | 105.0       | 14          | 33.0      | 5.51       | 4.91       | 11.75       | 9           | 3639.0     | 69.9       | 1.187       | 166.9      | 0.09         | 13.8        | 0.263       |
| F <sub>2</sub> Plant-6  | 105.0       | 15          | 34.0      | 6.15       | 6.24       | 14.29       | 5           | 3397.0     | 632.7      | 0.918       | 0.0        | 0            | 0.0         | 0           |
| F <sub>2</sub> Plant-7  | 87.0        | 15          | 27.0      | 4.63       | 3.34       | 9.35        | 5           | 3258.5     | 257.7      | 0.889       | 0.0        | 0            | 0.0         | 0           |
| F <sub>2</sub> Plant-8  | 90.0        | 28          | 24.9      | 7.03       | 6.14       | 14.83       | 5           | 3164.0     | 185.5      | 0.518       | 328.0      | 0.146        | 24.5        | 0.238       |
| F <sub>2</sub> Plant-9  | 108.0       | 13          | 33.5      | 5.41       | 6.96       | 14.19       | 3           | 3297.0     | 335.1      | 1.021       | 0.0        | 0            | 0.0         | 0           |
| F <sub>2</sub> Plant-10 | 114.5       | 16          | 35.5      | 6.63       | 7.37       | 16.17       | 5           | 3312.5     | 261.9      | 1.263       | 0.0        | 0            | 0.0         | 0           |
| F <sub>2</sub> Plant-11 | 98.3        | 23          | 26.4      | 7.41       | 7.38       | 16.42       | 7           | 2767.0     | 125.3      | 1.402       | 0.0        | 0            | 0.0         | 0           |
| F <sub>2</sub> Plant-12 | 110.9       | 17          | 35.0      | 6.95       | 8.23       | 17.25       | 5           | 3197.0     | 139.9      | 1.184       | 160.6      | 0.27         | 23.3        | 0.463       |
| F <sub>2</sub> Plant-13 | 102.5       | 23          | 27.2      | 6.77       | 6.17       | 14.75       | 7           | 2674.5     | 38.8       | 1.215       | 0.0        | 0            | 0.0         | 0           |
| F <sub>2</sub> Plant-14 | 90.4        | 19          | 28.2      | 4.79       | 6.43       | 12.96       | 5           | 2889.5     | 151.5      | 1.326       | 224.0      | 0.144        | 20.1        | 0.286       |
| F <sub>2</sub> Plant-15 | 103.7       | 17          | 25.6      | 6.72       | 6.47       | 15.32       | 5           | 3193.5     | 290        | 1.313       | 0.0        | 0            | 0.0         | 0           |
| F <sub>2</sub> Plant-16 | 95.7        | 20          | 37.0      | 6.31       | 7.47       | 14.99       | 5           | 3072.5     | 194.8      | 1.863       | 0.0        | 0            | 0.0         | 0           |
| F <sub>2</sub> Plant-17 | 105.5       | 17          | 31.2      | 7.93       | 7.91       | 16.98       | 7           | 3137.0     | 94.4       | 1.792       | 0.0        | 0            | 0.0         | 0           |
| F <sub>2</sub> Plant-18 | 112.6       | 16          | 32.0      | 7.36       | 8.45       | 17.88       | 5           | 3118.0     | 269.1      | 1.432       | 175.7      | 0.071        | 12.6        | 0.227       |

| <b>Genotype</b>         | <b>PLHT</b> | <b>TILL</b> | <b>CL</b> | <b>LDW</b> | <b>SDW</b> | <b>TSDW</b> | <b>LFDG</b> | <b>TWU</b> | <b>LFA</b> | <b>TRDW</b> | <b>DRL</b> | <b>DRVOL</b> | <b>DRSA</b> | <b>DRAD</b> |
|-------------------------|-------------|-------------|-----------|------------|------------|-------------|-------------|------------|------------|-------------|------------|--------------|-------------|-------------|
| F <sub>2</sub> Plant-19 | 101.8       | 39          | 29.5      | 12.31      | 11.87      | 25.5        | 5           | 3203.0     | 129.4      | 1.982       | 133.6      | 0.07         | 10.8        | 0.258       |
| F <sub>2</sub> Plant-20 | 106.5       | 27          | 32.0      | 9.73       | 11.53      | 22.89       | 5           | 3281.5     | 286.4      | 1.530       | 0.0        | 0            | 0.0         | 0           |
| F <sub>2</sub> Plant-21 | 105.9       | 23          | 33.0      | 7.64       | 9.88       | 19.11       | 3           | 3112.0     | 178.2      | 1.485       | 249.7      | 0.069        | 14.7        | 0.187       |
| F <sub>2</sub> Plant-22 | 105.8       | 38          | 32.2      | 11.64      | 11.81      | 24.52       | 7           | 3218.0     | 19.2       | 2.107       | 325.6      | 0.102        | 20.4        | 0.2         |
| F <sub>2</sub> Plant-23 | 110.8       | 21          | 36.5      | 7.57       | 8.45       | 17.54       | 5           | 3187.0     | 115.6      | 1.277       | 378.6      | 0.054        | 16.0        | 0.135       |
| F <sub>2</sub> Plant-24 | 106.3       | 14          | 35.5      | 9.8        | 13.14      | 25.43       | 3           | 5220.5     | 602.2      | 2.149       | 8999.2     | 1.844        | 451.8       | 0.773       |
| F <sub>2</sub> Plant-25 | 89.1        | 25          | 28.2      | 11.29      | 11.08      | 24.08       | 3           | 5388.0     | 404.5      | 2.033       | 10416.1    | 1.875        | 486.9       | 0.599       |
| F <sub>2</sub> Plant-26 | 111.5       | 18          | 32.5      | 10.35      | 9.17       | 21.92       | 1           | 5743.0     | 632.4      | 2.294       | 13263.2    | 2.828        | 673.0       | 0.954       |
| F <sub>2</sub> Plant-27 | 106.1       | 14          | 33.1      | 9.42       | 9.76       | 21.45       | 1           | 5294.0     | 749.4      | 2.005       | 10388.6    | 2.559        | 568.6       | 0.677       |
| F <sub>2</sub> Plant-28 | 115.8       | 22          | 26.9      | 10.38      | 10.01      | 22.46       | 1           | 5363.5     | 666.4      | 0.873       | 2075.9     | 0.446        | 107.8       | 0.165       |
| F <sub>2</sub> Plant-29 | 107.5       | 24          | 29.0      | 11.05      | 9.67       | 22.97       | 3           | 5300.0     | 397.9      | 2.135       | 12174.4    | 2.173        | 572.3       | 0.74        |
| F <sub>2</sub> Plant-30 | 104.0       | 22          | 30.2      | 8.71       | 9.21       | 20.01       | 5           | 5605.0     | 538.8      | 2.300       | 12882.9    | 2.786        | 662.7       | 0.812       |
| F <sub>2</sub> Plant-31 | 116.5       | 14          | 40.5      | 9.37       | 9.37       | 21.75       | 5           | 5668.5     | 580.2      | 2.761       | 14249.2    | 4.283        | 856.7       | 1.355       |
| F <sub>2</sub> Plant-32 | 97.0        | 12          | 32.5      | 9.28       | 10.91      | 22.58       | 1           | 5285.0     | 594.9      | 1.404       | 7257.9     | 1.262        | 332.5       | 0.439       |
| F <sub>2</sub> Plant-33 | 105.5       | 20          | 30.5      | 10.16      | 8.95       | 21.15       | 3           | 5312.5     | 748.1      | 1.641       | 9465.2     | 1.816        | 451.7       | 0.617       |
| F <sub>2</sub> Plant-34 | 108.5       | 17          | 29.4      | 11.41      | 11.04      | 24.85       | 1           | 5632.0     | 851.8      | 2.277       | 1813.0     | 0.382        | 93.3        | 0.164       |
| F <sub>2</sub> Plant-35 | 107.4       | 13          | 41.5      | 5.96       | 11.66      | 20.06       | 1           | 5563.0     | 392.8      | 2.753       | 5417.8     | 3.444        | 479.7       | 1.119       |
| F <sub>2</sub> Plant-36 | 112.6       | 17          | 29.5      | 7.72       | 9.95       | 19.41       | 1           | 5259.0     | 464.3      | 1.873       | 1710.7     | 0.452        | 98.5        | 0.183       |
| F <sub>2</sub> Plant-37 | 114.0       | 22          | 33.5      | 10.35      | 11.93      | 24.77       | 5           | 5345.5     | 305.4      | 2.356       | 9658.5     | 2.395        | 534.4       | 0.691       |
| F <sub>2</sub> Plant-38 | 108.0       | 18          | 32.0      | 7.62       | 10.44      | 20.3        | 3           | 5371.5     | 582.3      | 2.672       | 4236.2     | 1.024        | 229.6       | 0.338       |
| F <sub>2</sub> Plant-39 | 102.7       | 15          | 31.0      | 7.04       | 12.71      | 21.73       | 1           | 5465.0     | 623.5      | 3.068       | 7781.7     | 2.458        | 487.8       | 0.608       |
| F <sub>2</sub> Plant-40 | 120.2       | 13          | 47.0      | 7.98       | 14.37      | 25.35       | 1           | 5490.5     | 744.5      | 2.732       | 6813.9     | 2.164        | 428.5       | 0.601       |

| <b>Genotype</b>         | <b>PLHT</b> | <b>TILL</b> | <b>CL</b> | <b>LDW</b> | <b>SDW</b> | <b>TSDW</b> | <b>LFDG</b> | <b>TWU</b> | <b>LFA</b> | <b>TRDW</b> | <b>DRL</b> | <b>DRVOL</b> | <b>DRSA</b> | <b>DRAD</b> |
|-------------------------|-------------|-------------|-----------|------------|------------|-------------|-------------|------------|------------|-------------|------------|--------------|-------------|-------------|
| F <sub>2</sub> Plant-41 | 106.4       | 21          | 39.0      | 8.81       | 14.21      | 25.66       | 5           | 5343.0     | 618.3      | 2.737       | 6251.4     | 1.818        | 368.9       | 0.724       |
| F <sub>2</sub> Plant-42 | 91.0        | 23          | 29.5      | 7.39       | 11.43      | 20.54       | 3           | 5345.5     | 353.5      | 3.329       | 1660.3     | 0.513        | 102.4       | 0.383       |
| F <sub>2</sub> Plant-43 | 93.9        | 19          | 30.8      | 7.45       | 8.68       | 18.61       | 5           | 5221.0     | 393.2      | 2.09        | 5793.4     | 2.094        | 373.6       | 0.837       |
| F <sub>2</sub> Plant-44 | 112.7       | 17          | 37.3      | 7.99       | 10.31      | 21.23       | 3           | 5740.0     | 466.2      | 3.501       | 20397.9    | 4.923        | 1099.7      | 1.385       |
| F <sub>2</sub> Plant-45 | 85.4        | 28          | 28.3      | 8.75       | 10.98      | 21.25       | 1           | 5541.0     | 555.5      | 3.155       | 12619.8    | 2.377        | 609.3       | 0.775       |
| F <sub>2</sub> Plant-46 | 96.5        | 23          | 31.0      | 9.47       | 10.86      | 22.63       | 1           | 5532.5     | 408.3      | 3.356       | 9762.7     | 2.226        | 514.5       | 0.834       |

Abbreviations: PLHT=Plant height; TILL=Tillers per plant; CL=Culm length; LDW=Leaf dry weight; SDW=Stem dry weight; TSDW=Total shoot dry weight; LFDG=Leaf drying; TWU=Total water uptake; LFA=Leaf area; TRDW=Total root dry weight; DRL=Deep root length (Below 60cm); DRVOL=Deep root volume (Below 60cm); DRSA=Deep root surface area (Below 60cm); DRAD=Deep root average diameter (Below 60cm).
